# Supplementary material
Source: PubMed Central journal article supplement (PMC3057573)
Supplement: NIHMS204741-supplement-1.pdf [file NIHMS204741-supplement-1.pdf]

**Supplementary Table 1.** Sample demographics for participants included in genome-wide association analyses. Mean  $\pm$  s.d. are given.

| Sample Characteristic                                                     | FHS (up to n=2,753)              | GS EA (up to n=1,238)            | GS AA (up to n=840)              |
|---------------------------------------------------------------------------|----------------------------------|----------------------------------|----------------------------------|
| % Male                                                                    | 46.55                            | 44.89                            | 38.17                            |
| % Diabetic †                                                              | 8.68                             | 5.82                             | 11.65                            |
| % Hypertension ‡                                                          | 21.82                            | 26.35                            | 40.16                            |
| % Smoking                                                                 | 18.28                            | 22.87                            | 30.09                            |
| Age (years)                                                               | 54.8 $\pm$ 9.8                   | 44.5 $\pm$ 13.2                  | 43.3 $\pm$ 12.3                  |
| Body mass index (kg/m <sup>2</sup> )                                      | 27.4 $\pm$ 5.0                   | 28.6 $\pm$ 6.2                   | 31.8 $\pm$ 8.0                   |
| LDL cholesterol (mg/dl)                                                   | 126.9 $\pm$ 33.1                 | 125.3 $\pm$ 37.1                 | 120.9 $\pm$ 38.6                 |
| Fibrinogen (mg/dl)                                                        | 305.4 $\pm$ 57.8                 | 373.9 $\pm$ 111.5                | 417.4 $\pm$ 127.9                |
| Maximal aggregation to lower ADP dose used in meta-analysis (%)           | 67.3 $\pm$ 24.8 (ADP 3 $\mu$ M)  | 44.2 $\pm$ 26.3 (ADP 2 $\mu$ M)  | 40.6 $\pm$ 28.3 (ADP 2 $\mu$ M)  |
| Maximal aggregation to higher ADP dose used in meta-analysis (%)          | 77.6 $\pm$ 18.5 (ADP 5 $\mu$ M)  | 79.0 $\pm$ 14.1 (ADP 10 $\mu$ M) | 76.2 $\pm$ 17.6 (ADP 10 $\mu$ M) |
| Threshold concentration (EC50) for 50% response to ADP ( $\mu$ M)         | 3.29 $\pm$ 1.5                   | n/a                              | n/a                              |
| Maximal aggregation to lower epinephrine dose used in meta-analysis (%)   | 57.1 $\pm$ 31.0 (Epi 1 $\mu$ M)  | 55.2 $\pm$ 33.5 (Epi 2 $\mu$ M)  | 50.2 $\pm$ 36.2 (Epi 2 $\mu$ M)  |
| Maximal aggregation to higher epinephrine dose used in meta-analysis (%)  | 65.9 $\pm$ 28.4 (Epi 3 $\mu$ M)  | 70.8 $\pm$ 28.0 (Epi 10 $\mu$ M) | 62.3 $\pm$ 34.5 (Epi 10 $\mu$ M) |
| Threshold concentration (EC50) for 50% response to epinephrine ( $\mu$ M) | 1.93 $\pm$ 2.9                   | n/a                              | n/a                              |
| Lag time to collagen (seconds)                                            | 82.1 $\pm$ 20.1 (190 $\mu$ g/ml) | 103.1 $\pm$ 60.8 (2 $\mu$ g/ml)  | 114.5 $\pm$ 69.8 (2 $\mu$ g/ml)  |

Values given are mean  $\pm$  1 s.d. Sample sizes for specific phenotypes are found in the Online Methods section.

†definition of Type II diabetes: fasting blood glucose > 126 mg/dL and/or anti-hypoglycemic medication use

‡definition of Hypertension: systolic blood pressure of >140 and diastolic blood pressure >90 and/or anti-hypertensive medication use

EA = European-ancestry, AA = African-ancestry.

**Supplementary Table 2.** Loci with  $5.0 \times 10^{-8} < p < 1.0 \times 10^{-4}$  in European-ancestry (EA) cohorts and  $p < 0.05$  in GS African-ancestry (AA) for platelet aggregation phenotypes.

| SNP Information:<br>SNPId,<br>location,<br>gene                             | Coded<br>allele | Top EA SNP in<br>region: <sup>1</sup><br>SNPId, p-<br>value, r <sup>2</sup> | FHS<br>phenotype | FHS result:<br>p-value,<br>beta(sem),<br>MAF   | GS<br>phenotype | GS (EA)<br>result:<br>p-value,<br>beta(sem),<br>MAF | EA meta-<br>analysis p-<br>value | GS (AA) result:<br>p-value,<br>beta(sem),<br>MAF | EA + AA meta-<br>analysis p-value |
|-----------------------------------------------------------------------------|-----------------|-----------------------------------------------------------------------------|------------------|------------------------------------------------|-----------------|-----------------------------------------------------|----------------------------------|--------------------------------------------------|-----------------------------------|
| <b>Loci associated with ADP aggregation</b>                                 |                 |                                                                             |                  |                                                |                 |                                                     |                                  |                                                  |                                   |
| <b>rs525455 (A&gt;G)*</b><br>Chr 10: 13,143,291<br>Gene: <b>MST151</b>      | G               | rs525455<br>5.5x10 <sup>-5</sup><br>Same SNP                                | ADP EC50 †       | 7.6x10 <sup>-4</sup><br>-0.02 (0.01)<br>45.9%  | ADP 10uM        | 0.023<br>1.34 (0.59)<br>46.2%                       | 5.5x10 <sup>-5</sup>             | 1.4x10 <sup>-3</sup><br>-3.52 (1.1)<br>26.6%     | 6.7x10 <sup>-7</sup>              |
| <b>rs179429 (G&gt;A)</b><br>Chr 11: 2,507,306<br>Gene: <b>KCNQ1</b>         | A               | rs179428<br>5.9x10 <sup>-6</sup><br>r <sup>2</sup> =0.87                    | ADP EC50 †       | 0.015<br>-0.02 (0.01)<br>16.7%                 | ADP 10uM        | 4.1x10 <sup>-4</sup><br>2.47 (0.70)<br>17.6%        | 6.3x10 <sup>-5</sup>             | 0.033<br>2.54 (1.2)<br>17.3%                     | 7.0x10 <sup>-6</sup>              |
| <b>rs1457806 (C&gt;T)</b><br>Chr 4: 160,934,451<br>Gene: <b>RAPGEF2</b>     | T               | rs9996294<br>9.1x10 <sup>-7</sup><br>r <sup>2</sup> =0.55                   | ADP 5uM          | 0.013<br>0.02 (0.01)<br>13.4%                  | ADP 10uM        | 7.2x10 <sup>-5</sup><br>3.22 (0.81)<br>12.1%        | 1.2x10 <sup>-5</sup>             | 0.028<br>-2.29 (1.0)<br>41.4%                    | 3.9x10 <sup>-3</sup>              |
| <b>Loci associated with epinephrine aggregation</b>                         |                 |                                                                             |                  |                                                |                 |                                                     |                                  |                                                  |                                   |
| <b>rs7071247 (G&gt;T)*</b><br>Chr 10: 105,247,776<br>Gene: <b>NEURL</b>     | T               | rs3014183<br>3.5x10 <sup>-5</sup><br>r <sup>2</sup> =0.92                   | Epi EC50 †       | 0.019<br>-0.07 (0.03)<br>11.9%                 | Epi 10uM        | 2.0x10 <sup>-4</sup><br>5.54 (1.5)<br>15.6%         | 5.6x10 <sup>-5</sup>             | 1.8x10 <sup>-4</sup><br>8.60 (2.3)<br>21.7%      | 2.0x10 <sup>-7</sup>              |
| <b>rs6052699 (G&gt;A)</b><br>Chr 20: 4,559,877<br>Gene: <b>nearest PRNP</b> | A               | rs6052699<br>9.5x10 <sup>-5</sup><br>Same SNP                               | Epi EC50 †       | 6.1x10 <sup>-4</sup><br>0.07 (0.02)<br>49.3% † | Epi 2uM         | 0.047<br>-2.80 (1.4)<br>46.8%                       | 9.5x10 <sup>-5</sup>             | 2.5x10 <sup>-3</sup><br>6.56 (2.2)<br>23.6% ‡    | 1.7x10 <sup>-6</sup>              |
| <b>rs4947339 (C&gt;T)*</b><br>Chr 6: 29,024,231<br>Gene: <b>near TRIM27</b> | T               | rs6906909<br>2.0x10 <sup>-5</sup><br>r <sup>2</sup> =1.00                   | Epi EC50 †       | 1.4x10 <sup>-3</sup><br>-0.06 (0.02)<br>43.8%  | Epi 10uM        | 5.2x10 <sup>-3</sup><br>3.14 (1.1)<br>44.3%         | 2.8x10 <sup>-5</sup>             | 0.025<br>-5.47 (2.4)<br>14.5% ‡                  | 2.4x10 <sup>-6</sup>              |
| <b>rs1903595 (A&gt;G)</b><br>Chr 8: 14,433,852<br>Gene: <b>SGCZ</b>         | G               | rs10111879<br>1.8x10 <sup>-5</sup><br>r <sup>2</sup> =0.25                  | Epi 3uM          | 0.021<br>0.11 (0.05)<br>30.3%                  | Epi 10uM        | 2.1x10 <sup>-4</sup><br>0.16 (0.04)<br>31.8%        | 3.4x10 <sup>-5</sup>             | 0.033<br>0.21 (0.10)<br>7.9%                     | 4.5x10 <sup>-6</sup>              |
| <b>rs1874445 (C&gt;T)</b><br>Chr 11: 10,648,297<br>Gene: <b>MRVI1</b>       | T               | rs4909945<br>7.6x10 <sup>-7</sup><br>r <sup>2</sup> =0.61                   | Epi 3uM          | 0.010<br>0.11 (0.04)<br>37.6%                  | Epi 10uM        | 1.8x10 <sup>-3</sup><br>0.13 (0.04)<br>40.2%        | 1.9x10 <sup>-3</sup>             | 0.05<br>0.10 (0.05)<br>39.3%                     | 2.0x10 <sup>-5</sup>              |
| <b>rs7526348 (A&gt;G)</b><br>Chr 1: 190,390,334<br>Gene: <b>near RGS18</b>  | G               | rs9996294<br>6.7x10 <sup>-6</sup><br>r <sup>2</sup> =1.00                   | Epi EC50 †       | 1.6x10 <sup>-4</sup><br>-0.06 (0.02)<br>49.1%  | Epi 2uM         | 0.014<br>3.67 (1.5)<br>49.9%                        | 8.3x10 <sup>-6</sup>             | 0.030<br>4.33 (2.0)<br>32.6%                     | 1.9x10 <sup>-3</sup>              |

|                                               |   |                      |               |                      |             |                      |                      |                      |                      |
|-----------------------------------------------|---|----------------------|---------------|----------------------|-------------|----------------------|----------------------|----------------------|----------------------|
| <b>rs6590203 (A&gt;G)*</b>                    |   | rs2236653            |               | 1.4x10 <sup>-3</sup> |             | 4.5x10 <sup>-3</sup> |                      | 0.029                |                      |
| Chr 11: 125,779,407                           | G | 3.0x10 <sup>-6</sup> | Epi EC50 †    | -0.06 (0.02)         | Epi 10uM    | 3.50 (1.2)           | 2.6x10 <sup>-5</sup> | -3.95 (1.8)          | 4.0x10 <sup>-3</sup> |
| Gene: <b>ST3GAL4</b>                          |   | r <sup>2</sup> =0.87 |               | 41.0%                |             | 38.1%                |                      | 44.9% ‡              |                      |
| <b>rs9888055 (C&gt;T)*</b>                    |   | rs11007689           |               | 9.1x10 <sup>-4</sup> |             | 0.021                |                      | 1.4x10 <sup>-3</sup> |                      |
| Chr 10: 29,995,655                            | T | 4.4x10 <sup>-5</sup> | Epi EC50 †    | 0.08 (0.02)          | Epi 2uM     | -4.11 (1.8)          | 6.4x10 <sup>-5</sup> | 7.27 (2.3)           | 0.02                 |
| Gene: <b>SVIL</b>                             |   | r <sup>2</sup> =1.00 |               | 17.7%                |             | 20.2%                |                      | 40.6%                |                      |
| <b>Loci associated with collagen lag time</b> |   |                      |               |                      |             |                      |                      |                      |                      |
| <b>rs7044355 (A&gt;G)*</b>                    |   | rs9299064            |               | 8.8x10 <sup>-5</sup> |             | 0.037                |                      | 8.2x10 <sup>-4</sup> |                      |
| Chr 9: 8,186,511                              | G | 1.3x10 <sup>-5</sup> | Lag 190 ug/mL | 0.01<br>(0.004)      | Lag 2ug/mL  | 0.012<br>(0.006)     | 1.3x10 <sup>-5</sup> | -0.081 (0.024)       | 1.2x10 <sup>-7</sup> |
| Gene: <b>near PTPRD</b>                       |   | r <sup>2</sup> =0.60 |               | 49.9% ‡              |             | 49.9% ‡              |                      | 27.0%                |                      |
| <b>rs6581827 (T&gt;C)</b>                     |   | rs6581827            |               | 7.3x10 <sup>-4</sup> |             | 4.5x10 <sup>-3</sup> |                      | 0.036                |                      |
| Chr 12: 67,170,158                            | C | 1.5x10 <sup>-5</sup> | Lag 190 ug/mL | -0.01<br>(0.003)     | Lag 2ug/mL  | -0.017<br>(0.006)    | 1.5x10 <sup>-5</sup> | -0.057 (0.027)       | 3.2x10 <sup>-3</sup> |
| Gene: <b>near RAP1B</b>                       |   | Same SNP             |               | 46.2%                |             | 48.9%                |                      | 21.0% ‡              |                      |
| <b>rs12367822 (G&gt;T)*</b>                   |   | rs1870672            |               | 4.8x10 <sup>-4</sup> |             | 6.6x10 <sup>-3</sup> |                      | 0.038                |                      |
| Chr 12: 55,490,427                            | T | 1.2x10 <sup>-5</sup> | Lag 190 ug/mL | 0.01<br>(0.003)      | Lag 2ug/mL  | 0.018<br>(0.007)     | 1.3x10 <sup>-5</sup> | 0.063 (0.030)        | 1.1x10 <sup>-6</sup> |
| Gene: <b>HSD17B6</b>                          |   | r <sup>2</sup> =0.90 |               | 27.7%                |             | 28.6%                |                      | 15.3%                |                      |
| <b>rs2602376 (C&gt;T)</b>                     |   | rs6715829            |               | 0.018                |             | 7.4x10 <sup>-5</sup> |                      | 0.032                |                      |
| Chr 2: 234,246,790                            | T | 1.2x10 <sup>-5</sup> | Lag 190 ug/mL | -0.01<br>(0.003)     | Lag 2 ug/mL | -0.026<br>(0.0066)   | 3.6x10 <sup>-5</sup> | 0.099 (0.046)        | 0.01                 |
| Gene: <b>UGT1A10</b>                          |   | r <sup>2</sup> =0.56 |               | 28.6%                |             | 28.5%                |                      | 6.7%                 |                      |

Maximum sample sizes in GS AA were for ADP 10uM (n=836), epinephrine 10uM (n=840) and collagen 2ug/mL (n=763). For full details see Online Methods.

<sup>†</sup>The top meta-analysis SNP and p-value in EA for the same trait, and LD with the selected replication SNP based on HapMap CEU using SNAP<sup>1</sup> (Johnson et al., 2008).

\*multiple SNPs in the gene region had p<0.05 in GS AA but only the most significant SNP in combined analysis is given

†The betas presented in the Table relate directly to the coded alleles and phenotypes presented. Because threshold concentrations (EC50 traits) are inversely related with maximal aggregation response, the signs of the betas for EC50 traits were flipped before meta-analysis.

‡For this population the coded allele was not the same as the minor allele

EA = European-ancestry, AA = African-ancestry.

**Supplementary Table 3.** Platelet aggregation GWAS results for SNPs associated with 2 different agonists with the same direction of effect in meta-analyses in European-ancestry (EA) cohorts (both SNPs  $p < 1.0 \times 10^{-4}$ ), with the same SNP or a highly correlated SNP ( $r^2 > 0.9$ ) being associated.

| Gene(s) in region          | Chr | Pos (Mb) | Agonist meta-analysis | SNP        | Meta-analysis p-value in EA | Agonist meta-analysis | SNP        | Meta-analysis p-value in EA | Relationship between agonist SNPs | Replication evidence in AA with genotyped SNP? |
|----------------------------|-----|----------|-----------------------|------------|-----------------------------|-----------------------|------------|-----------------------------|-----------------------------------|------------------------------------------------|
| <i>PEAR1</i>               | 1   | 155.1    | ADP3um2um             | rs12566888 | 3.4e-12 (++)                | EpiEC50 2um           | rs12566888 | 7.3e-10 (++)                | Same SNP                          | Yes                                            |
| <i>RGS18</i>               | 1   | 190.4    | ADP5um10um            | rs4128880  | 4.0e-05 (++)                | EpiEC50 2um           | rs4128880  | 6.8e-07 (++)                | Same SNP                          | Yes                                            |
| <i>NUP210</i>              | 3   | 13.3     | ADPEC50 10um          | rs9841645  | 8.8e-05 (++)                | EpiEC50 10um          | rs9841645  | 4.2e-05 (++)                | Same SNP                          | No (1 SNP in region)                           |
| <i>FBXL7</i>               | 5   | 15.5     | ADP5um10um            | rs304586   | 2.3e-05 (++)                | Epi1um2um             | rs304586   | 2.9e-06 (++)                | Same SNP                          | No (1 SNP in region)                           |
| <i>ADAMTS2</i>             | 5   | 178.7    | ADP3um2um             | rs467053   | 7.1e-05 (--)                | Epi3um10um            | rs467053   | 6.8e-05 (--)                | Same SNP                          | No (1 SNP in region)                           |
| <i>GMDS</i>                | 6   | 2.3      | ADP3um2um             | rs2479008  | 6.1e-05 (++)                | Epi1um2um             | rs2505675  | 8.1e-05 (++)                | $r^2=1.00$                        | No (1 SNP in region)                           |
| <i>KLHL31</i>              | 6   | 53.6     | ADP5um10um            | rs9474604  | 6.3e-05 (++)                | Epi1um2um             | rs6901352  | 6.0e-05 (++)                | $r^2=1.00$                        | No (1 SNP in region)                           |
| <i>WBSR17</i>              | 7   | 70.6     | ADPEC50 2um           | rs4236251  | 1.7e-05 (++)                | Epi3um10um            | rs4236251  | 6.3e-05 (++)                | Same SNP                          | No (2 SNPs in region)                          |
| <i>STMN4</i>               | 8   | 27.1     | ADPEC50 10um          | rs17366330 | 5.6e-05 (++)                | EpiEC50 10um          | rs17366330 | 9.0e-05 (++)                | Same SNP                          | n/a                                            |
| <i>PSKH2, ATP6V0D2</i>     | 8   | 87.1     | ADPEC50 10um          | rs16876805 | 8.7e-06 (++)                | EpiEC50 2um           | rs16876805 | 7.9e-06 (++)                | Same SNP                          | No (1 SNP in region)                           |
| <i>PIP5K1B</i>             | 9   | 70.7     | ADPEC50 2um           | rs11144351 | 2.2e-07 (++)                | EpiEC50 10um          | rs11144351 | 8.0e-06 (++)                | Same SNP                          | No (8 SNPs in region)                          |
| <i>CUBN</i>                | 10  | 17.1     | ADP3um2um             | rs12359150 | 1.9e-05 (++)                | EpiEC50 2um           | rs12359150 | 8.1e-05 (++)                | Same SNP                          | No (1 SNP in region)                           |
| <i>SVIL</i>                | 10  | 29.9     | ADPEC50 10um          | rs3847393  | 8.2e-05 (--)                | EpiEC50 2um           | rs3847393  | 5.9e-05 (--)                | Same SNP                          | Yes                                            |
| <i>MRVI1</i>               | 11  | 10.6     | ADP5um10um            | rs7940646  | 2.0e-08 (++)                | EpiEC50 10um          | rs4909945  | 7.6e-07 (++)                | $r^2=0.96$                        | Yes                                            |
| <i>MIPOL1</i>              | 14  | 36.8     | ADPEC50 2um           | rs7143938  | 4.9e-05 (++)                | Epi3um10um            | rs7143938  | 2.2e-05 (++)                | Same SNP                          | No (16 SNPs in region)                         |
| <i>THSD4</i>               | 15  | 69.6     | ADPEC50 10um          | rs12443484 | 4.4e-05 (++)                | EpiEC50 10um          | rs12443484 | 8.2e-05 (++)                | Same SNP                          | n/a                                            |
| <i>FLJ39743</i>            | 15  | 96.7     | ADP3um2um             | rs8030441  | 1.5e-05 (--)                | Epi1um2um             | rs8030441  | 3.3e-05 (--)                | Same SNP                          | No (1 SNP in region)                           |
| <i>KIAA0802</i>            | 18  | 8.8      | ADP3um2um             | rs689607   | 7.2e-05 (++)                | Epi1um2um             | rs689607   | 9.6e-06 (++)                | Same SNP                          | No (1 SNP in region)                           |
| <i>SETBP1</i>              | 18  | 39.9     | ADP5um10um            | rs17686693 | 5.4e-06 (++)                | Epi3um10um            | rs17686693 | 1.3e-06 (++)                | Same SNP                          | n/a                                            |
| <i>HMG1L1, PCK1, CTCFL</i> | 20  | 55.5     | ADPEC50 2um           | rs6123703  | 1.1e-06 (++)                | EpiEC50 10um          | rs6123703  | 5.2e-06 (++)                | Same SNP                          | No (1 SNP in region)                           |

p-values are given in columns with the direction of effect relative to the minor allele is indicated in parentheses for FHS and then GS EA cohorts, respectively. For those regions with no replication evidence in AA the number of SNPs with  $p < 1.0 \times 10^{-4}$  in EA cohorts that were genotyped and tested in AA is listed. "n/a" indicates no genotyped SNPs were available for testing.

EA = European-ancestry, AA = African-ancestry.

**Supplementary Table 4.** Overview of loci associated with platelet aggregation in response to agonists in the current study including known functions particularly of relevance to platelet biology, known gene expression in platelets or megakaryocytes, and other genes in the region.

| Locus                                                   | Representative gene and description of known functions                                                                                                                                                                                                                                                                                                                                       | Effects of minor alleles on platelet aggregation to agonists | Expression in platelets | Expression in megakaryocytes <sup>†</sup> | Other genes ± 60kb of peak SNP         |
|---------------------------------------------------------|----------------------------------------------------------------------------------------------------------------------------------------------------------------------------------------------------------------------------------------------------------------------------------------------------------------------------------------------------------------------------------------------|--------------------------------------------------------------|-------------------------|-------------------------------------------|----------------------------------------|
| <b>Loci with <math>p &lt; 5.0 \times 10^{-8}</math></b> |                                                                                                                                                                                                                                                                                                                                                                                              |                                                              |                         |                                           |                                        |
| 1q23.1                                                  | <i>PEAR1</i> – a transmembrane receptor phosphorylated upon platelet-platelet contact <sup>2</sup> , expressed in platelets and endothelial cells, activation inhibited by inhibitors of platelet aggregation                                                                                                                                                                                | ↓ ADP, ↓ epinephrine                                         | Yes <sup>2,3</sup>      | not measured                              | <i>NTRK1, C1orf92, ARHGEF11, INSRR</i> |
| 11p15.4                                                 | <i>MRVI1</i> – inositol-1,4,5-triphosphate receptor-kinase I, expressed in platelets, deletion of a phosphorylated domain in mice inhibits fibrinogen-receptor activation and platelet aggregation, deletion also causes failure of NO to prevent arterial thrombosis in a mouse model <sup>4</sup>                                                                                          | ↑ ADP, ↑ epinephrine                                         | Yes <sup>4</sup>        | ↑ 1.1 fold <sup>5</sup>                   |                                        |
| 7q36.3                                                  | <i>SHH</i> – key protein influencing developmental patterning and embryogenesis, SHH-positive microvesicles may induce differentiation along megakaryocyte lineages <sup>6</sup>                                                                                                                                                                                                             | ↑ ADP                                                        | Unknown                 | ↓ 0.7 fold                                |                                        |
| 10q25.2                                                 | <i>ADRA2A</i> - epinephrine receptor on platelet cell surface, prior associations implicate the gene in inter-individual variability in epinephrine-induced aggregation <sup>7-9</sup> with suggested mediation via RNA and protein levels <sup>10</sup>                                                                                                                                     | ↓ epinephrine                                                | Yes <sup>9,10</sup>     | ↑ 2.3 fold                                |                                        |
| 7q22.3                                                  | <i>PIK3CG</i> - phosphatidylinositol 3-kinase, animal models indicate a role in $\alpha_{IIb}\beta_3$ activated platelet aggregation and thrombosis <sup>11</sup> , in macrophage activation <sup>12</sup> and wound healing <sup>13</sup> . Specific inhibitors show effects on arthritis <sup>14</sup> and SLE <sup>15</sup> . Prior human associations with platelet volume <sup>16</sup> | ↓ epinephrine                                                | Yes <sup>16</sup>       | ↑ 3.7 fold                                | <i>FLJ36031</i>                        |

|                                                                                                               |                                                                                                                                                                                                                                                                                  |                       |                         |              |                              |
|---------------------------------------------------------------------------------------------------------------|----------------------------------------------------------------------------------------------------------------------------------------------------------------------------------------------------------------------------------------------------------------------------------|-----------------------|-------------------------|--------------|------------------------------|
| 10q21.2                                                                                                       | <i>JMJD1C</i> – member of the jumonji family of transcription factors, classified as a thyroid hormone receptor. Animal models support a role for jumonji in development of cardiac myocytes as well as proliferation of megakaryocytes <sup>17</sup>                            | ↑ epinephrine         | Unknown                 | ↑ 4.0 fold   |                              |
| 19q13.42                                                                                                      | <i>GP6</i> – direct receptor for activation of platelet aggregation on collagen contact, previous functional variation described <sup>18,19</sup> , critical to wound closure while also a factor in thrombus formation <sup>20</sup>                                            | ↑ collagen lag        | Yes <sup>18,19,20</sup> | ↑ 7.0 fold   | <i>NLRP2, RDH13</i>          |
| <b>Selected suggestive regions (consistent across ≥2 populations, <math>p &gt; 5.0 \times 10^{-8}</math>)</b> |                                                                                                                                                                                                                                                                                  |                       |                         |              |                              |
| 4q32.1                                                                                                        | <i>RAPGEF2</i> - guanine nucleotide exchange factor involved in signaling, with a role in the activation of <i>RAP1</i> <sup>21,22</sup> (see below)                                                                                                                             | ↑ ADP                 | Unknown                 | not measured |                              |
| 11p15.5                                                                                                       | <i>KCNQ1</i> – voltage-gated potassium channel, mutated in some long QT syndromes                                                                                                                                                                                                | ↑ ADP                 | Unknown                 | ↓ 0.7 fold   |                              |
| 17q11.2                                                                                                       | <i>TAOK1</i> – serine-threonine protein kinase, may regulate mitotic progression, previously associated with mean platelet volume <sup>23</sup>                                                                                                                                  | ↑ ADP                 | Unknown                 | ↑ 6.8 fold   |                              |
| 3q25.1                                                                                                        | <i>P2RY12</i> - purinergic receptor involved in ADP activation of platelet aggregation, prior candidate gene associations implicate in ADP response and bleeding disorders                                                                                                       | ↓ ADP                 | Yes                     | ↓ 0.6 fold   | <i>MED12L, GPR87, P2RY13</i> |
| 1q31.2                                                                                                        | <i>RGS18</i> - regulator of G-protein signaling 18, highly expressed in platelets and megakaryocytes <sup>24-27</sup> , its phosphorylation may be an important mediator of platelet signaling <sup>27</sup>                                                                     | ↑ ADP , ↑ epinephrine | Yes <sup>24-27</sup>    | ↑ 36.8 fold  |                              |
| 11q24.2                                                                                                       | <i>ST3GAL4</i> - sialyltransferase that interacts with Ashwell receptors for clearance of desialylated platelets with effects on platelet homeostasis <sup>28</sup> . Genetic lesion in mice and expression defects in humans indicate a role in bleeding disorder <sup>29</sup> | ↑ epinephrine         | Yes                     | ↑ 1.5 fold   | <i>KIRREL3</i>               |

|        |                                                                                                                                                                                                                                                                                                                                                                                                                                                                              |                |                      |             |                                                         |
|--------|------------------------------------------------------------------------------------------------------------------------------------------------------------------------------------------------------------------------------------------------------------------------------------------------------------------------------------------------------------------------------------------------------------------------------------------------------------------------------|----------------|----------------------|-------------|---------------------------------------------------------|
| 20p13  | <i>PRNP</i> – human prion protein (PrP <sup>C</sup> ), a sialoglycoprotein expressed on platelets and upregulated upon platelet activation <sup>30</sup> . Notably human prion protein is normally isolated from platelets and this is a hypothesized tissue for transmission of Creutzfeldt-Jakob disease <sup>31</sup> . A variant (rs1799990) has been noted to be associated with the ability to amplify PrP <sup>C</sup> from individual platelet samples <sup>31</sup> | ↓ epinephrine  | Yes <sup>30,31</sup> | ↑ 5.2 fold  |                                                         |
| 12q15  | <i>RAP1B</i> – RAS-like protein similar to small GTP-binding proteins, has a demonstrated role in platelet aggregation <sup>32-34</sup> , specific role in collagen-mediated aggregation <sup>34</sup> , with known signaling relation with PIK3CG and RAPGEF2 (see above). Rap1b -/- mice have a bleeding defect due to defective platelet function, with decreased response to agonists and protection from arterial thrombosis <sup>35</sup>                              | ↓ collagen lag | Yes <sup>32-34</sup> | ↑ 17.8 fold |                                                         |
| 1q23.3 | <i>FCER1G</i> – high affinity IgE receptor subunit, critical to allergic reactions, gene previously associated with response to a collagen-related peptide <sup>3</sup>                                                                                                                                                                                                                                                                                                      | ↓ collagen lag | Yes <sup>3</sup>     | ↑ 26.2 fold | <i>NDUFS2, APOA2, TOMM40L, NR113, PCP4L1, MPZ, SDHC</i> |

<sup>†</sup> indicates the average fold intensity of a representative gene transcript relative to the mean background intensity across stem-cell derived megakaryocytes measured with the Illumina Human WG-6 v2 (n=4 individuals), further described in Watkins *et al.*<sup>36</sup>

**Supplementary Table 5.** Platelet aggregation meta-analysis GWAS results for prior candidate SNPs and gene regions.

| 5a. Platelet aggregation results for candidate SNPs.         |                   |                   |                         |                        |                     |                         |                        |              |                     |                        |                    |
|--------------------------------------------------------------|-------------------|-------------------|-------------------------|------------------------|---------------------|-------------------------|------------------------|--------------|---------------------|------------------------|--------------------|
| Gene                                                         | SNP               | Position          | ADP2uM3uM               | ADP5uM10uM             | ADPEC50 2uM         | ADPEC50 10uM            | Epi1uM2uM              | Epi3uM10uM   | EpiEC50             | EpiEC50 10uM           | Collagen           |
| <i>ITGB3</i>                                                 | rs5918            | Leu33Pro          | 0.38 (++)               | 0.91 (-+)              | 0.92 (-+)           | 0.73 (-+)               | 0.58 (-+)              | 0.96 (-+)    | 0.99 (-+)           | 0.71 (-+)              | 0.26 (-)           |
| <i>ITGA2</i>                                                 | <b>rs1126643</b>  | <b>Phe224Phe</b>  | 0.93 (-+)               | 0.20 (++)              | 0.82 (-+)           | 0.98 (-+)               | 0.65 (-+)              | 0.97 (-+)    | 0.41 (-+)           | 0.24 (-)               | <b>8.8e-03 (-)</b> |
| <i>GPIb<math>\alpha</math></i>                               | <b>rs6065</b>     | <b>Thr161Met</b>  | 0.71 (-+)               | 0.54 (-+)              | 0.83 (-+)           | 0.74 (-+)               | <b>0.03 (-)</b>        | 0.07 (-)     | <b>0.032 (-)</b>    | <b>0.027 (-)</b>       | 0.58 (++)          |
|                                                              | rs2243093         | -5 T/C            | 0.48 (-+)               | 0.42 (-)               | 0.71 (-+)           | 0.21 (+)                | 0.67 (++)              | 0.19 (++)    | 0.60 (++)           | 0.24 (++)              | 0.77 (-)           |
| <i>P2RY1</i> *                                               | rs701265          | Val262Val         | 0.051 (-)               | 0.93 (-+)              | 0.06 (-)            | 0.34 (-+)               | 0.12 (-)               | 0.054 (-)    | 0.22 (-)            | 0.11 (-)               | 0.68 (+)           |
| <i>P2RY12</i>                                                | <b>rs1472122</b>  | <b>5'UTR adj.</b> | <b>2.0e-04 (-)</b>      | <b>0.048 (-)</b>       | <b>9.5e-04 (-)</b>  | <b>8.0e-03 (-)</b>      | 0.19 (-)               | 0.08 (-+)    | 0.07 (-+)           | 0.10 (-+)              | 0.27 (++)          |
|                                                              | <b>rs10935839</b> | <b>intronic</b>   | 0.10 (-)                | 0.21 (-)               | <b>0.029 (-)</b>    | <b>0.018 (-)</b>        | 0.51 (-)               | 0.35 (-+)    | 0.13 (-+)           | 0.14 (-+)              | 0.50 (++)          |
| <i>PIK3CG</i> <sup>1</sup>                                   | <b>rs342293</b>   | <b>intergenic</b> | 0.28 (++)               | 0.44 (++)              | <b>4.5e-03 (++)</b> | <b>2.0e-03 (++)</b>     | <b>8.4e-04 (++)</b>    | 0.17 (++)    | <b>6.2e-09 (++)</b> | <b>4.3e-07 (++)</b>    | 0.82 (-)           |
| <i>ARHGEF3</i> <sup>2</sup>                                  | <b>rs12485738</b> | <b>intronic</b>   | <b>7.8e-03 (++)</b>     | 0.45 (++)              | <b>0.049 (++)</b>   | 0.16 (++)               | 0.80 (-+)              | 0.67 (-)     | <b>0.047 (++)</b>   | 0.15 (-)               | 0.22 (-)           |
| <i>TAOK1</i> <sup>2</sup>                                    | rs2138852         | intergenic        | 0.94 (-+)               | 0.55 (-+)              | 0.43 (-+)           | 0.19 (-+)               | 0.27 (-+)              | 0.18 (-+)    | 0.49 (-+)           | 0.35 (-+)              | 0.16 (-)           |
| <i>WDR66</i> <sup>2</sup>                                    | rs7961894         | intronic          | 0.09 (-)                | 0.21 (-)               | 0.74 (-+)           | 0.62 (-+)               | 0.12 (++)              | 0.07 (++)    | 0.08 (++)           | 0.21 (++)              | 0.19 (-)           |
| 5b. Platelet aggregation results for candidate gene regions. |                   |                   |                         |                        |                     |                         |                        |              |                     |                        |                    |
| Gene                                                         | Reason            | # SNPs tested     | ADP trait meta-analysis | SNP with lowest p-val. | p-value             | Epi trait meta-analysis | SNP with lowest p-val. | p-value      | Collagen            | SNP with lowest p-val. | p-value            |
| <i>ITGB3</i>                                                 | Candidate         | 156               | ADP5um10um              | rs11871477             | 0.025(-)            | Epi1um2um               | rs2071438              | 0.018 (++)   | Collagen            | rs2071438              | 0.013(-)           |
| <i>ITGA2</i>                                                 | Candidate         | 381               | ADP5um10um              | rs10059321             | 0.0017(-)           | Epi1um2um               | rs2056401              | 0.0012 (-)   | Collagen            | rs3212603              | 0.00030(++)        |
| <i>GPIb<math>\alpha</math></i>                               | Candidate         | 72                | ADPEC50 10um            | rs9901006              | 0.016(++)           | EpiEC50 10um            | rs2302318              | 0.0068 (++)  | Collagen            | rs2243107              | 0.15(++)           |
| <i>P2RY1</i>                                                 | Candidate         | 81                | ADP3um2um               | rs6803505              | 0.020(-)            | Epi1um2um               | rs9289876              | 0.022 (+)    | Collagen            | rs2165045              | 0.22(-)            |
| <i>P2RY12</i>                                                | <b>Candidate</b>  | <b>218</b>        | <b>ADP3um2um</b>        | <b>rs16863323</b>      | <b>8.2e-06 (-)</b>  | EpiEC50 10um            | rs16863336             | 0.0011 (-)   | Collagen            | rs6793061              | 0.035(-)           |
| <i>ARHGEF3</i>                                               | MPV <sup>2</sup>  | 144               | ADP5um10um              | rs4455300              | 0.00058(-)          | Epi1um2um               | rs9851853              | 0.0029 (++)  | Collagen            | rs11716680             | 0.016(-)           |
| <i>TAOK1</i>                                                 | MPV <sup>2</sup>  | <b>113</b>        | <b>ADP5um10um</b>       | <b>rs12936923</b>      | <b>6.9e-05 (++)</b> | Epi3um10um              | rs2586150              | 0.0029 (-)   | Collagen            | rs8070136              | 0.051(++)          |
| <i>WDR66</i>                                                 | MPV <sup>2</sup>  | 116               | ADPEC50 2um             | rs1169076              | 0.0049(-)           | EpiEC50 10um            | rs830120               | 0.013 (++)   | Collagen            | rs7976716              | 0.055(++)          |
| <i>RAF1</i>                                                  | ADP <sup>3</sup>  | 120               | ADP3um2um               | rs9809501              | 0.0051(++)          | Epi3um10um              | rs3773341              | 0.028 (++)   | Collagen            | rs4684111              | 0.0014(++)         |
| <i>JAK2</i>                                                  | ADP <sup>3</sup>  | 207               | ADPEC50 2um             | rs12377744             | 0.015(++)           | Epi3um10um              | rs10974892             | 0.023 (++)   | Collagen            | rs2182726              | 0.0030(++)         |
| <i>GNAZ</i>                                                  | ADP <sup>3</sup>  | 139               | ADPEC50 2um             | rs6003461              | 0.020(-)            | Epi3um10um              | rs737818               | 0.06 (++)    | Collagen            | rs6003461              | 0.07(++)           |
| <i>VAV3</i>                                                  | ADP <sup>3</sup>  | 563               | ADPEC50 10um            | rs6583042              | 0.0021(-)           | EpiEC50 10um            | rs17019729             | 0.00038 (++) | Collagen            | rs11185128             | 0.026(-)           |
| <i>MAP2K2</i>                                                | ADP <sup>3</sup>  | 50                | ADPEC50 10um            | rs350856               | 0.0049(-)           | EpiEC50 2um             | rs3760905              | 0.012 (++)   | Collagen            | rs164631               | 0.056(++)          |



|                      |                             |           |            |            |              |              |            |             |                 |                  |                    |
|----------------------|-----------------------------|-----------|------------|------------|--------------|--------------|------------|-------------|-----------------|------------------|--------------------|
| <i>MAPK14</i>        | ADP <sup>3</sup>            | 127       | ADP3um2um  | rs2145361  | 0.0080(--)   | EpiEC50 10um | rs13196204 | 0.015 (--)  | Collagen        | rs17715303       | 0.0017(--)         |
| <b><i>FCER1G</i></b> | <b>Collagen<sup>3</sup></b> | <b>92</b> | ADP3um2um  | rs10494345 | 0.0075(++)   | Epi1um2um    | rs4489574  | 0.028 (++)  | <b>Collagen</b> | <b>rs2501865</b> | <b>1.6e-05(--)</b> |
| <i>CD36</i>          | Collagen <sup>3</sup>       | 188       | ADP3um2um  | rs9649529  | 0.021(++)    | EpiEC50 10um | rs3212009  | 0.012 (--)  | Collagen        | rs13239216       | 0.012(++)          |
| <i>AKT2</i>          | Collagen <sup>3</sup>       | 65        | ADP5um10um | rs10402740 | 0.030(--)    | EpiEC50 2um  | rs8111561  | 0.0035 (++) | Collagen        | rs10415181       | 0.034(--)          |
| <i>MAP2K4</i>        | Collagen <sup>3</sup>       | 123       | ADP3um2um  | rs1468501  | 0.0039(--)   | Epi3um10um   | rs7215869  | 0.053 (--)  | Collagen        | rs8067785        | 0.0021(++)         |
| <i>ITPR1</i>         | Collagen <sup>3</sup>       | 646       | ADP5um10um | rs9858750  | 9.2e-05 (++) | Epi1um2um    | rs6793265  | 0.0011 (--) | Collagen        | rs304048         | 0.0015(--)         |

p-values are given in columns with the direction of effect for FHS and then GS European-ancestry cohorts, respectively, indicated in parentheses.

SNPs in bold have p-values <0.05 in Supplementary Table 5a, or survive a Bonferroni threshold of 0.05/n where n is the number of SNPs tested in the gene region in Supplementary Table 5b.

All SNPs in the meta-analysis within 60 kb of either end of the full length transcript were examined to determine the strongest SNP association in Supplementary Table 5b.

\*note candidate SNP P2RY1 893 C>T (rs1065776) is not found in HapMap or in the meta-analysis dataset

<sup>1</sup>Region and trait identified from Soranzo et al., 2009<sup>16</sup>.

<sup>2</sup>Regions and traits identified from Meisinger et al., 2009<sup>23</sup>.

<sup>3</sup>Regions and traits identified from Jones et al., 2009<sup>3</sup>.

**Supplementary Figure 1.** SNAP<sup>1</sup> regional plots of meta-analysis associations. ADP-induced aggregation **1a**: (3  $\mu$ M FHS, 2  $\mu$ M GS) at 1q23.1, **1b**: (5  $\mu$ M FHS, 10  $\mu$ M GS) at 11p15.4, **1c**: (EC50 FHS, 10  $\mu$ M GS) at 7q36.3, epinephrine-induced aggregation **1d**: (EC50 FHS, 2  $\mu$ M GS) at 10q25.2, **1e**: (EC50 FHS, 2  $\mu$ M GS) at 1q23.3, **1f**: (EC50 FHS, 2  $\mu$ M GS) at 7q22.3, **1g**: (EC50 FHS, 2  $\mu$ M GS) at 10q21.2, and lag time to collagen, **1h**: (2  $\mu$ g/mL FHS, 190  $\mu$ g/mL GS) at 19q13.42.

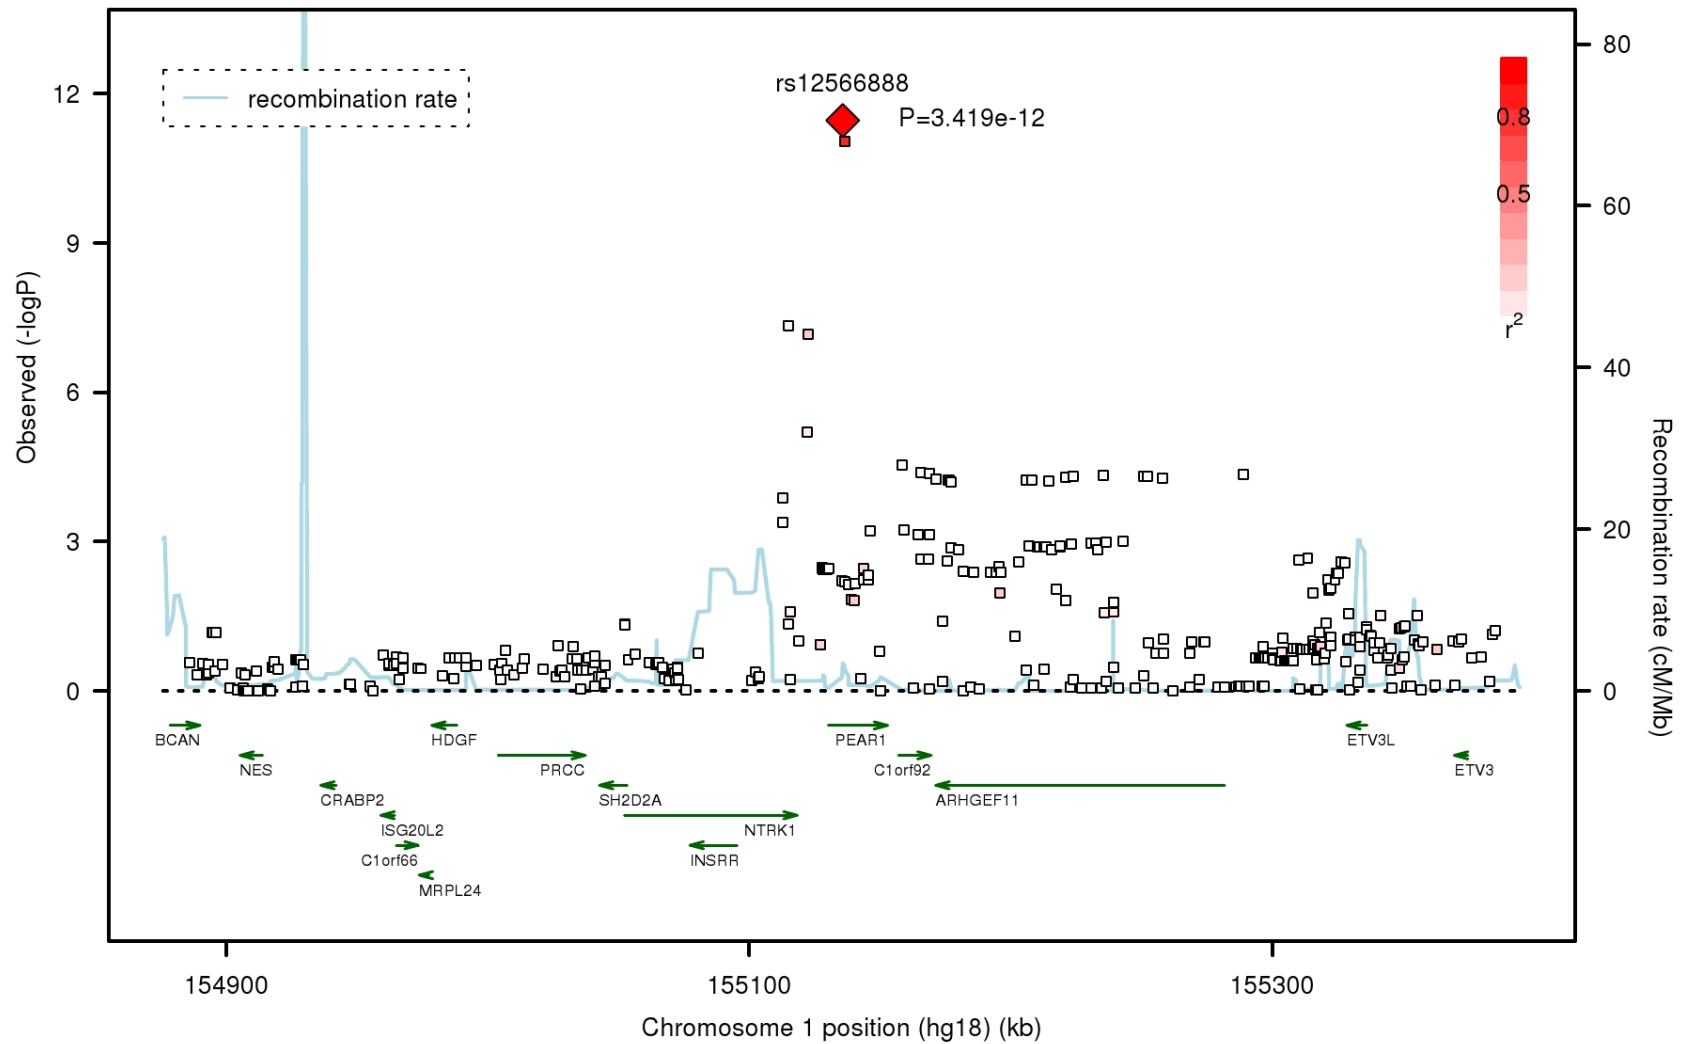

Supplementary Figure 1b

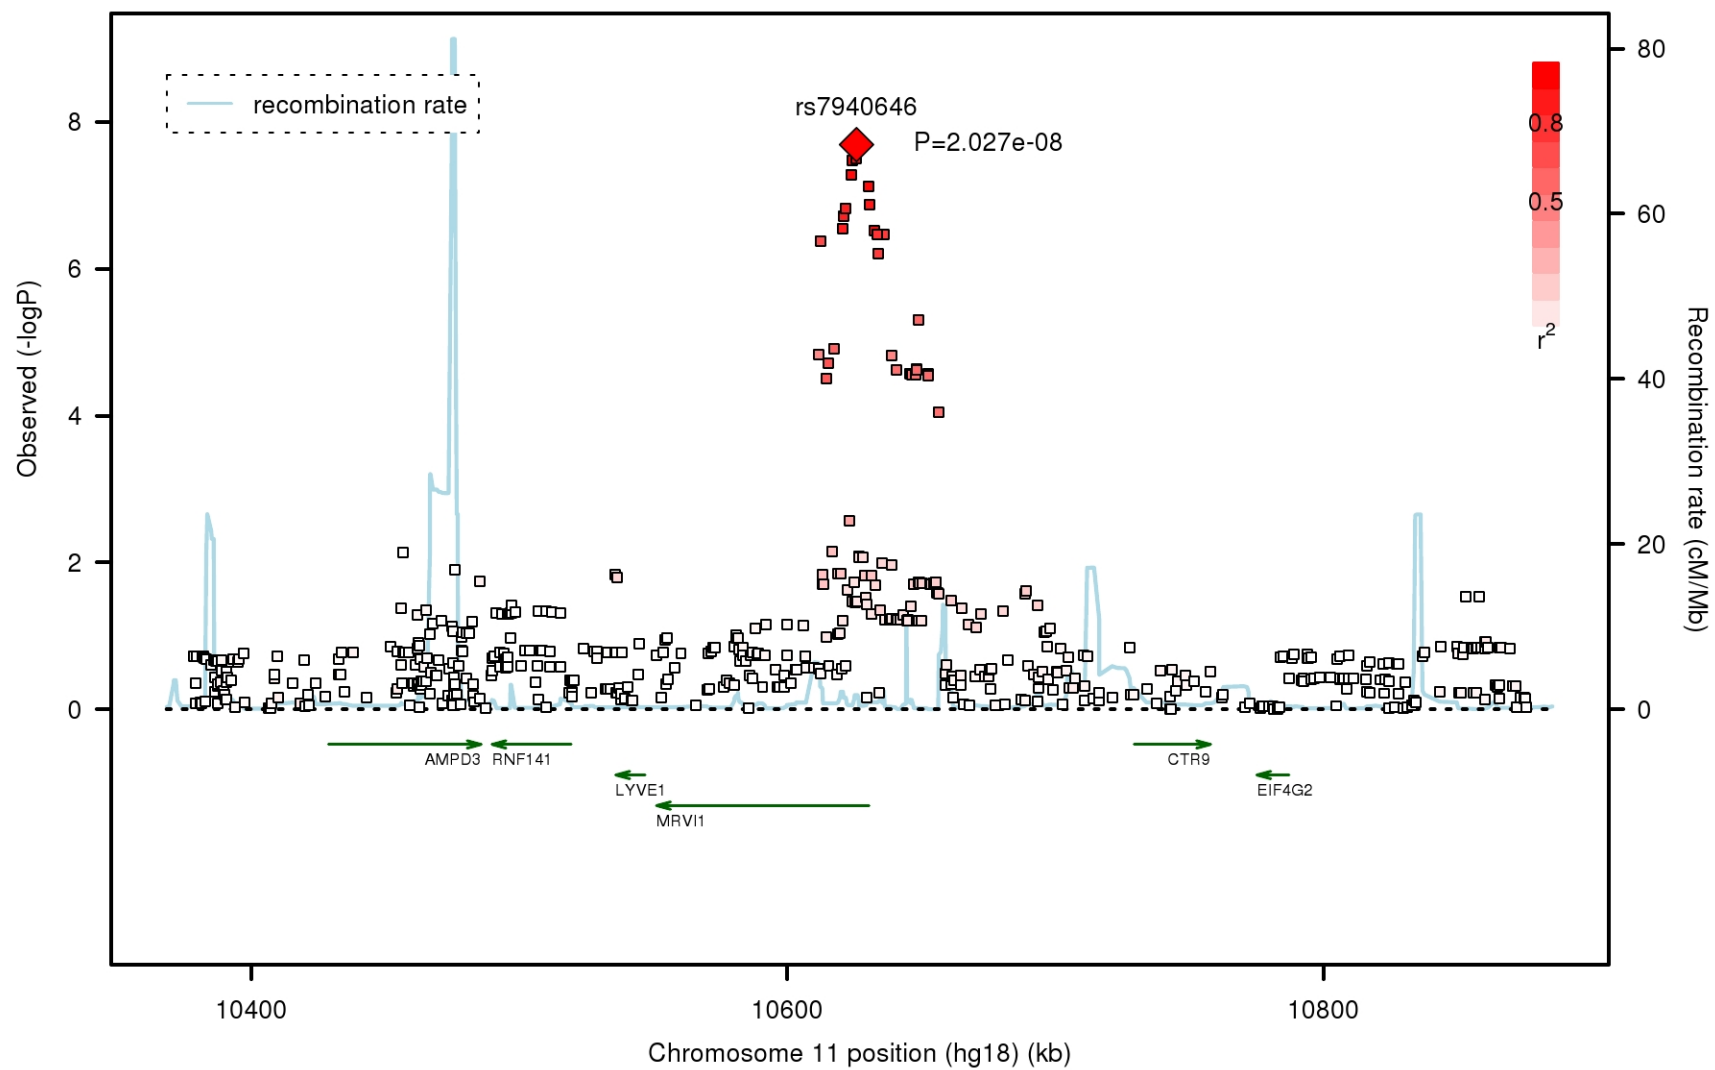

Supplementary Figure 1c

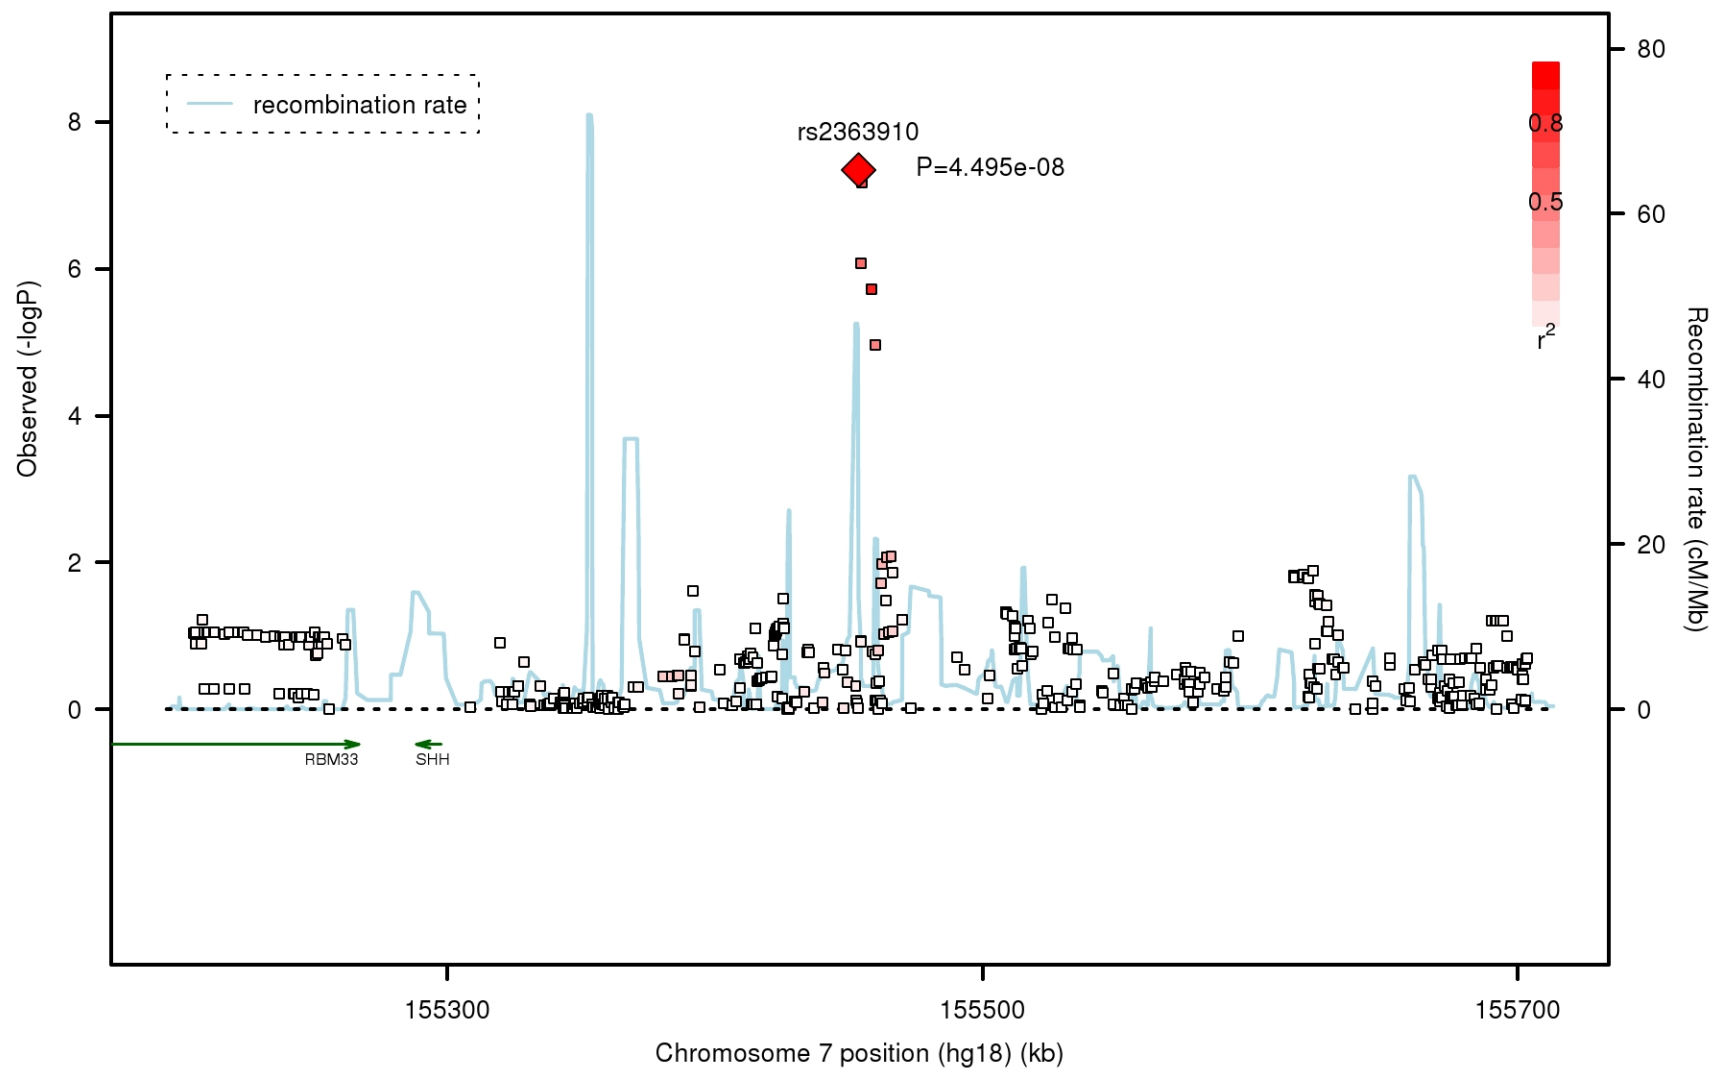

Supplementary Figure 1d

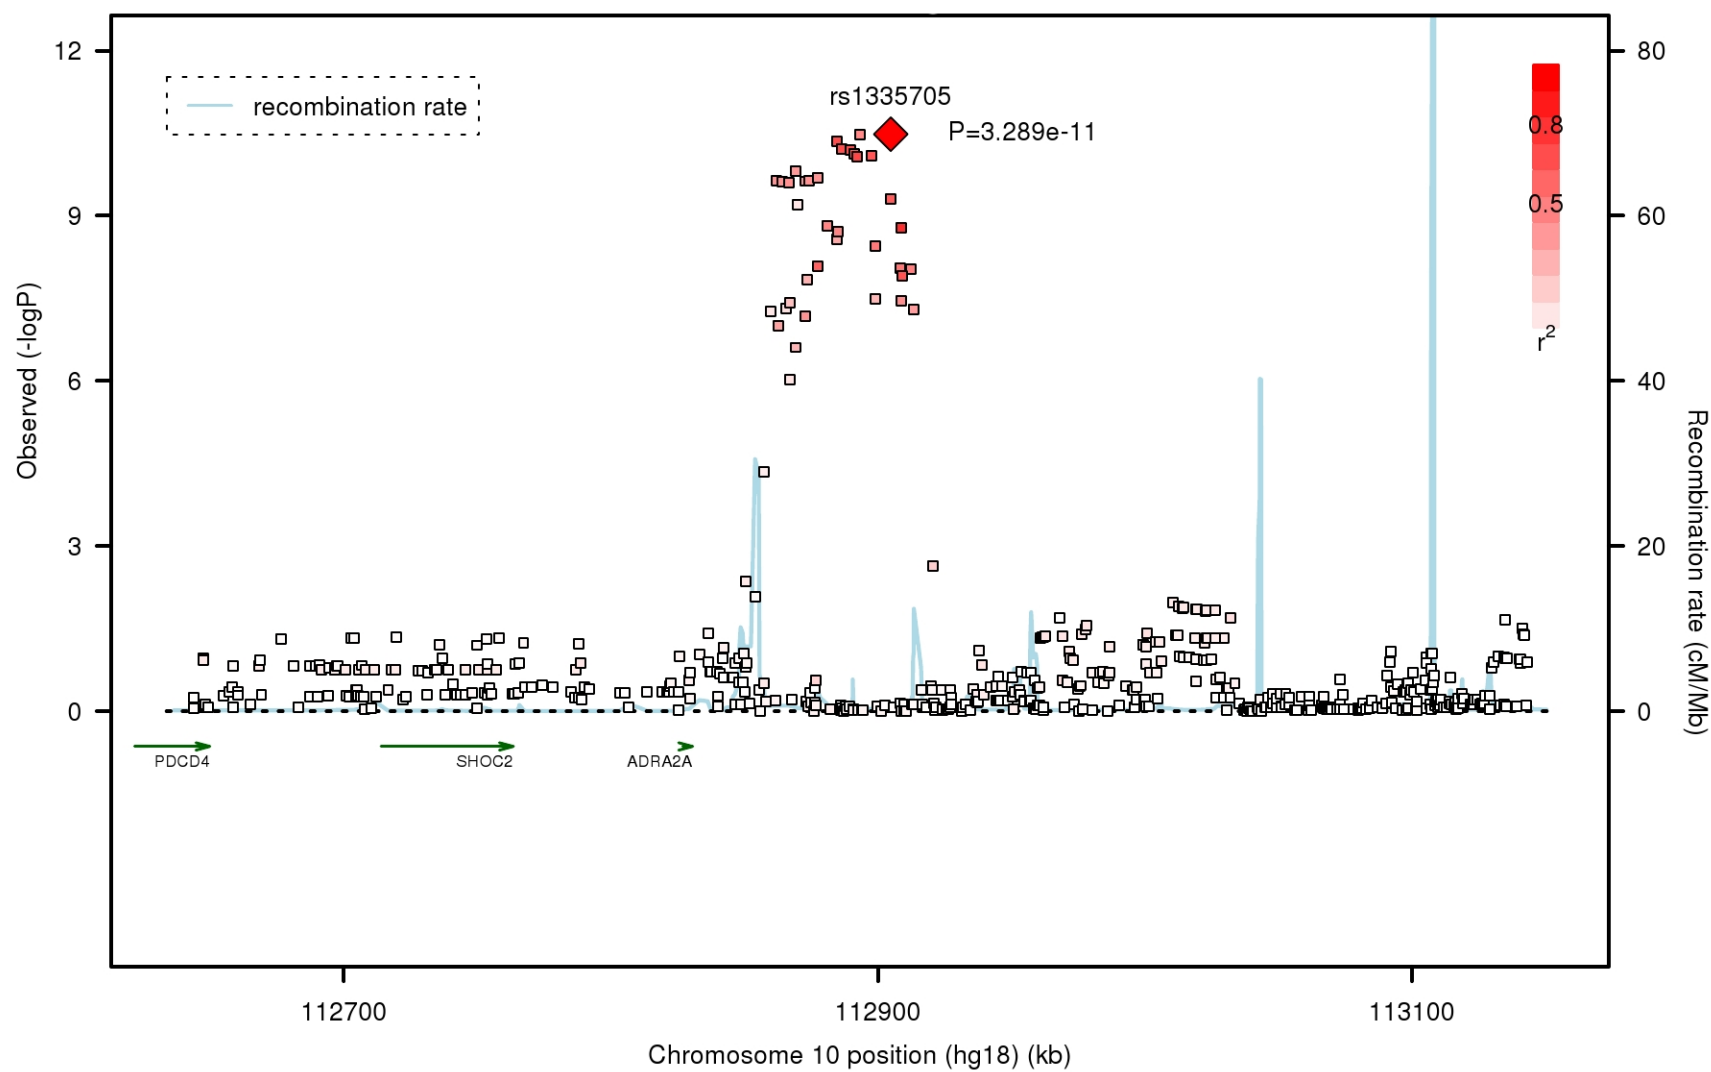

Supplementary Figure 1e

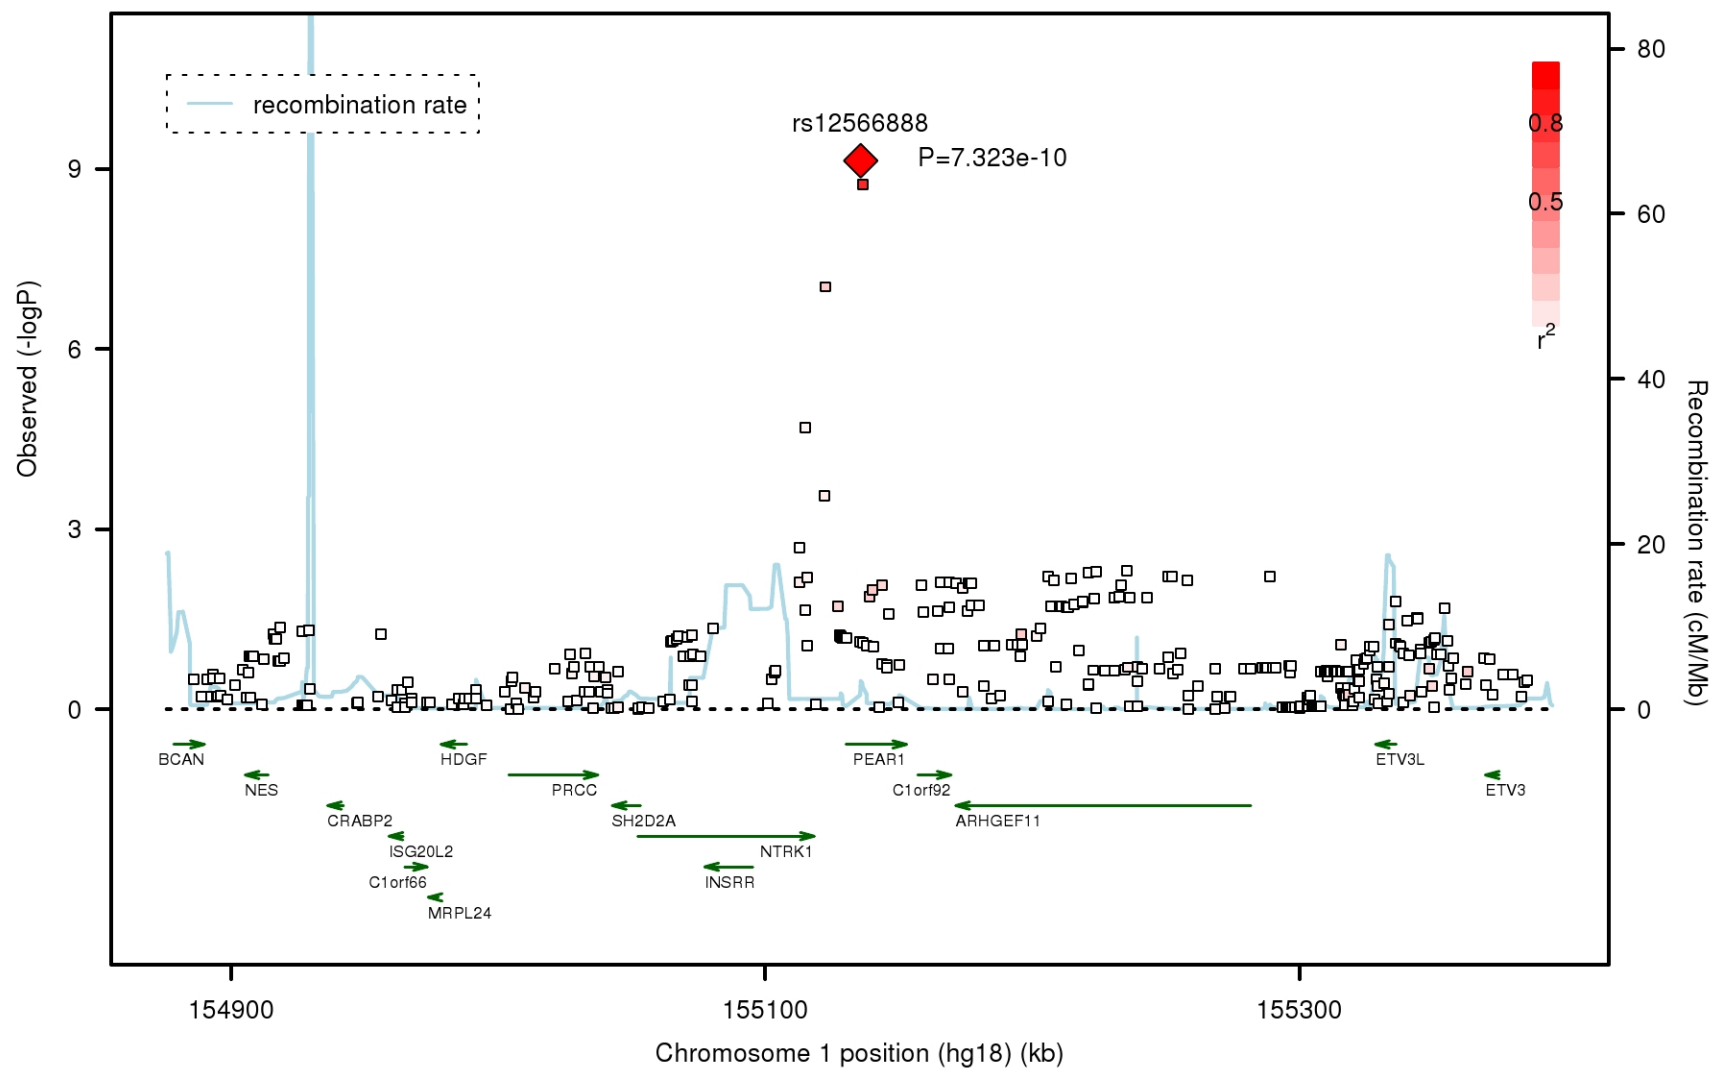

Supplementary Figure 1f

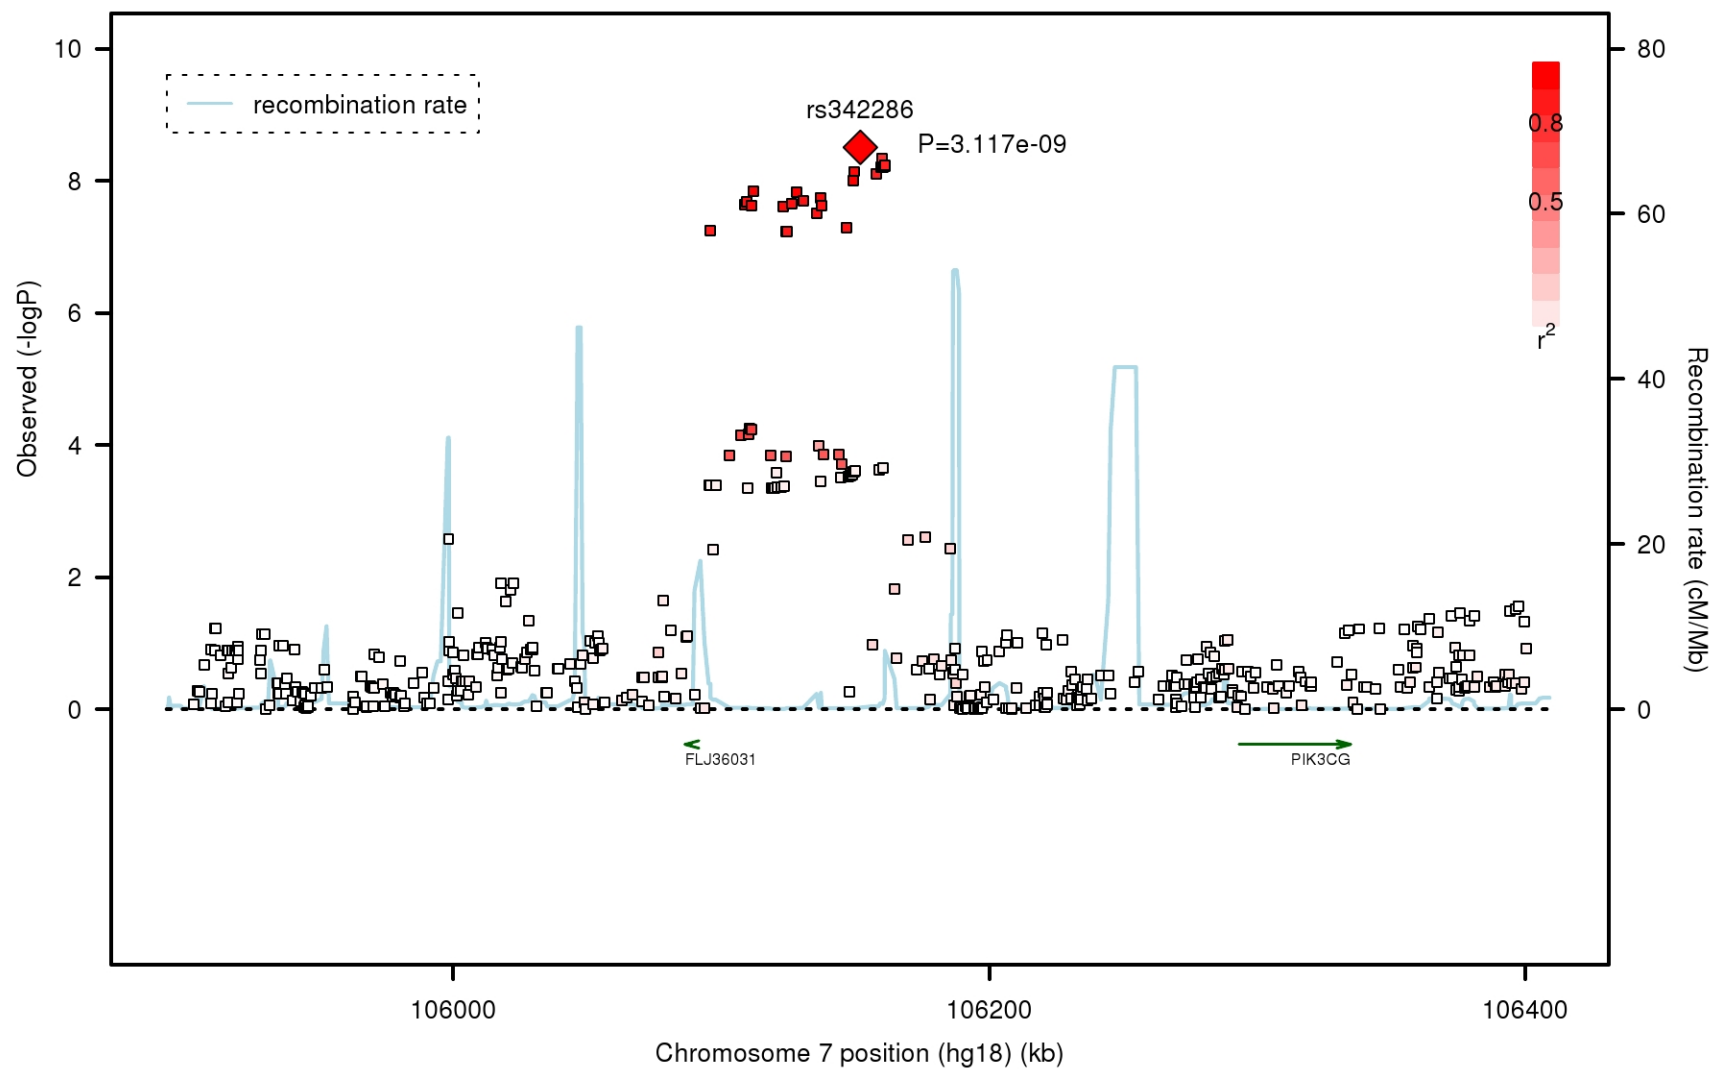

Supplementary Figure 1g

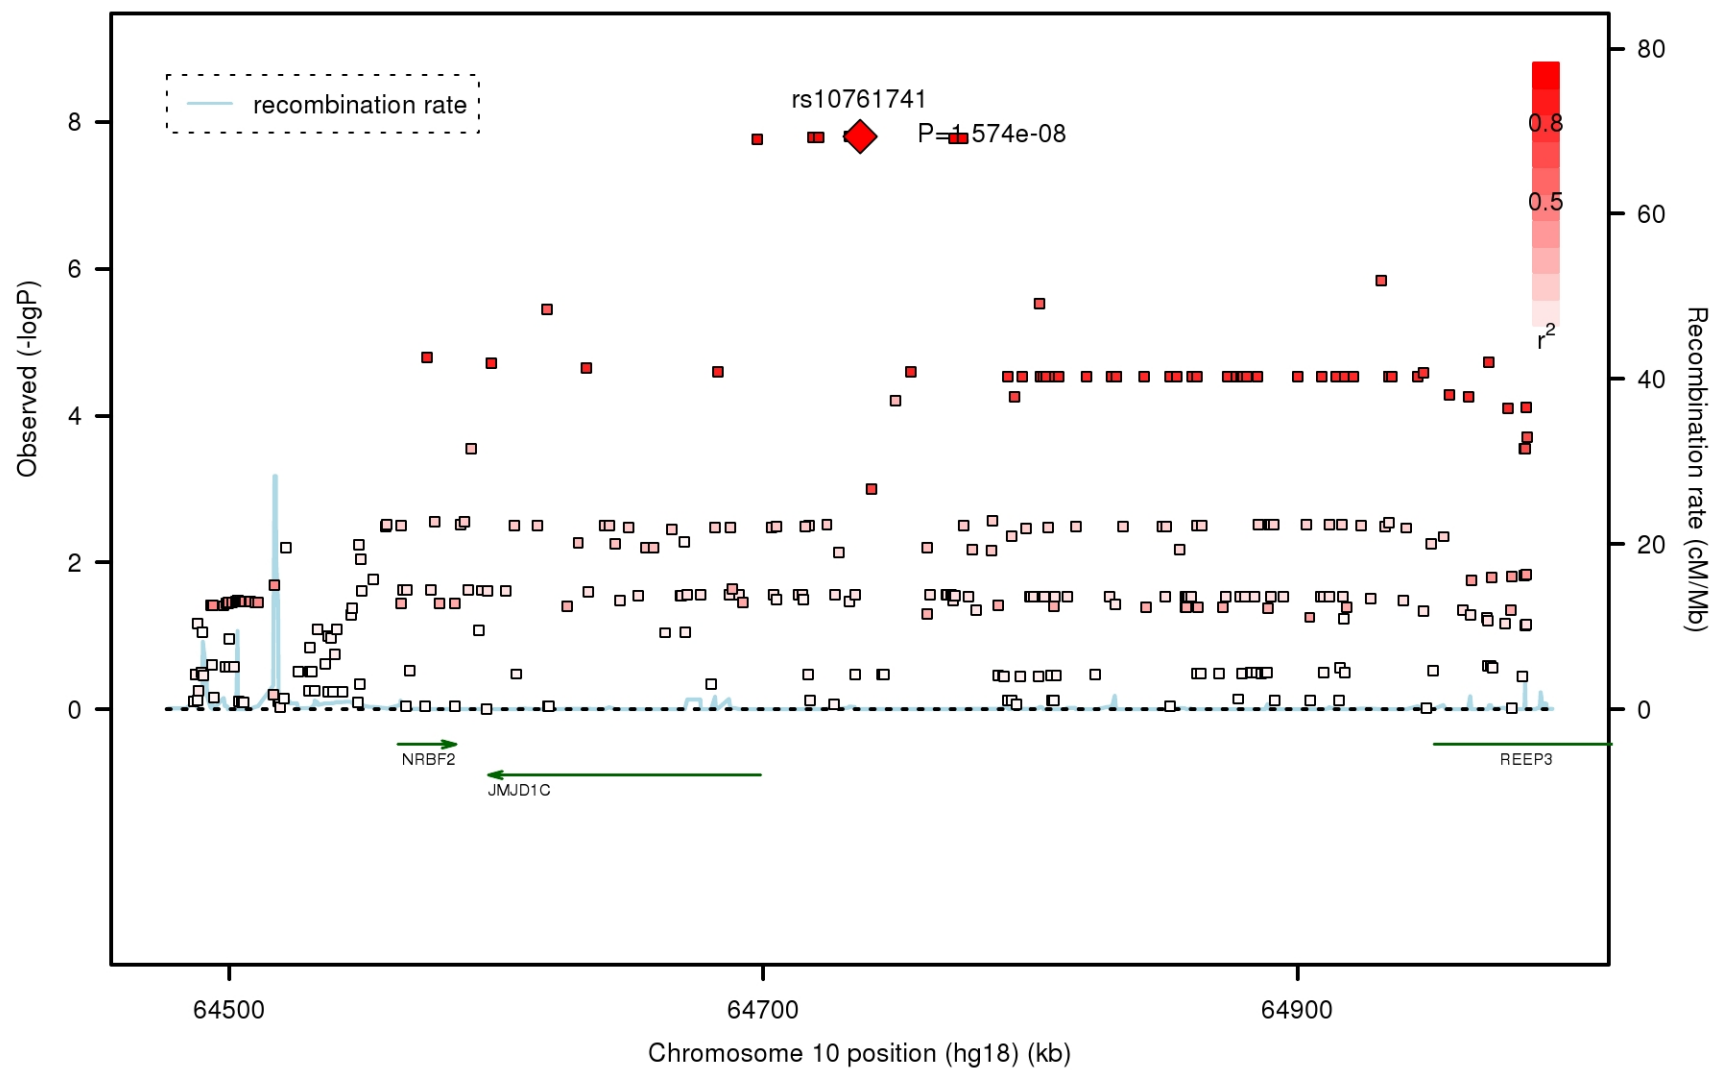



Supplementary Figure 1h

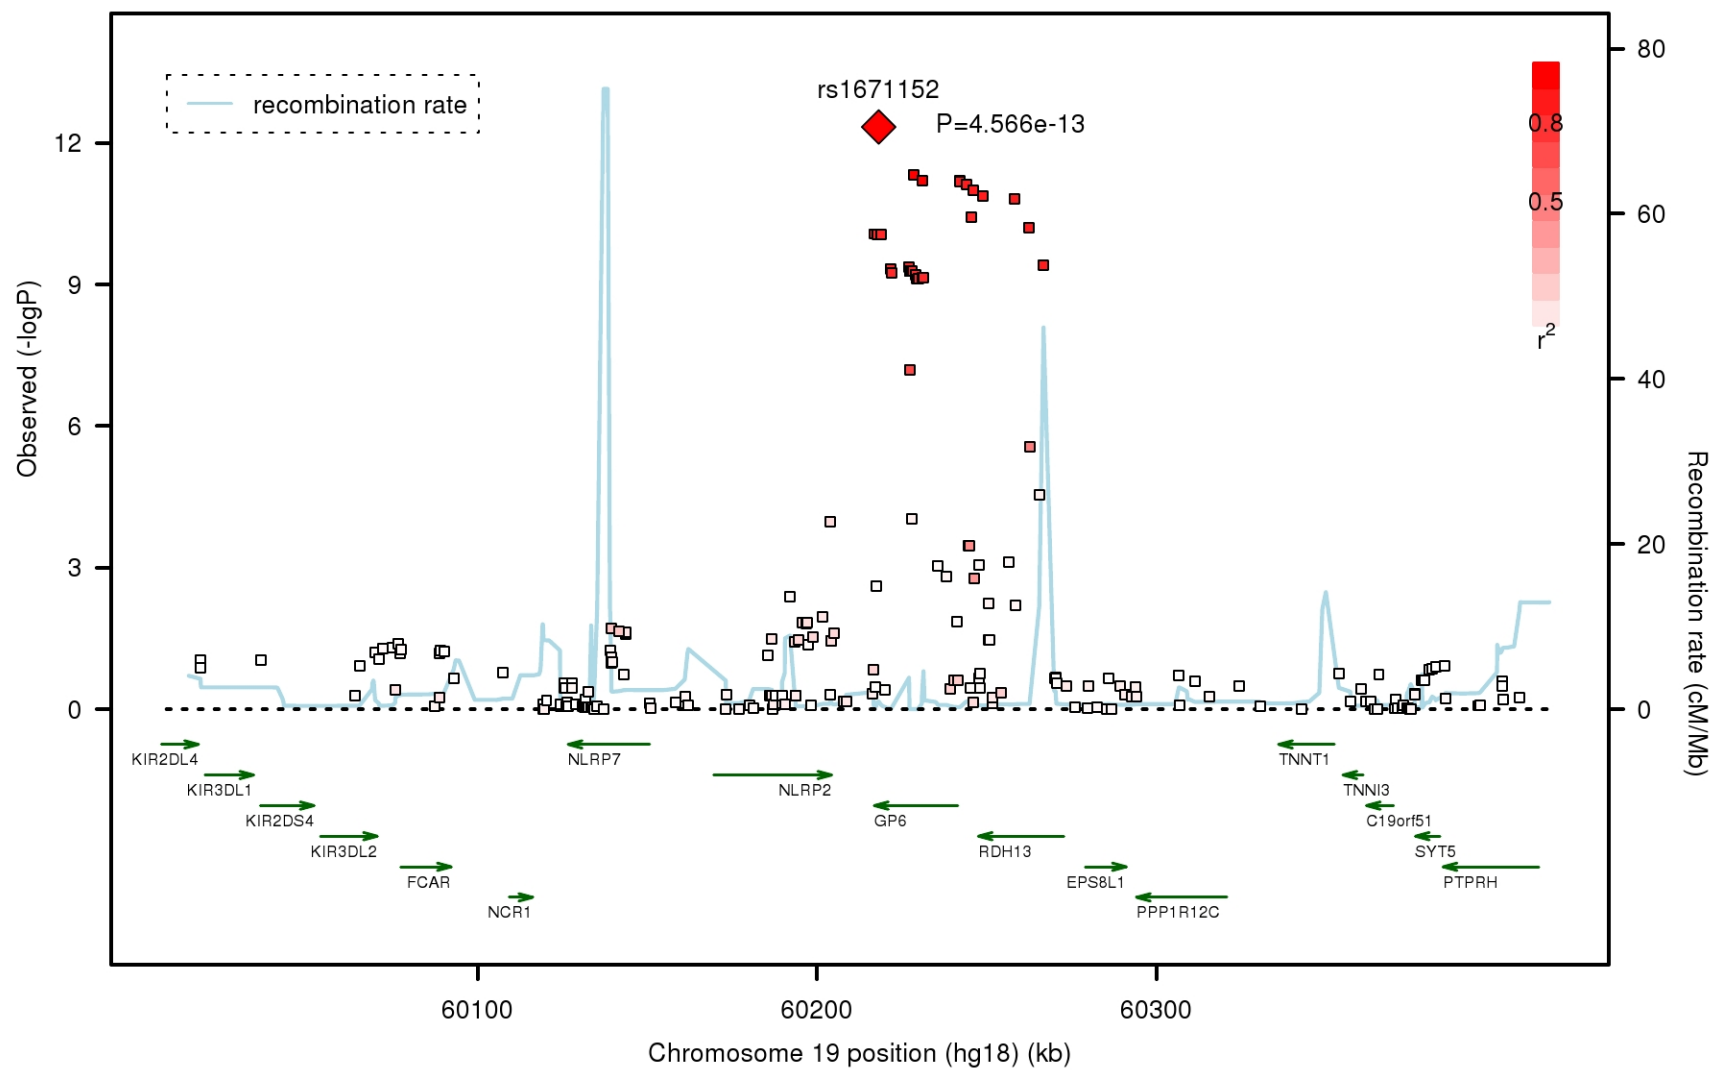

**Supplementary Figure 2.** Genome-wide association meta-analysis plot of associations with  $\log_{10}$  lag time in response to collagen after filtering of SNPs for QC. Colored points are SNPs  $\pm 250$  kb from a SNP with association stronger than a p-value threshold as follows: red ( $p < 5.0 \times 10^{-8}$ ) and orange ( $p < 4.0 \times 10^{-6}$ ).

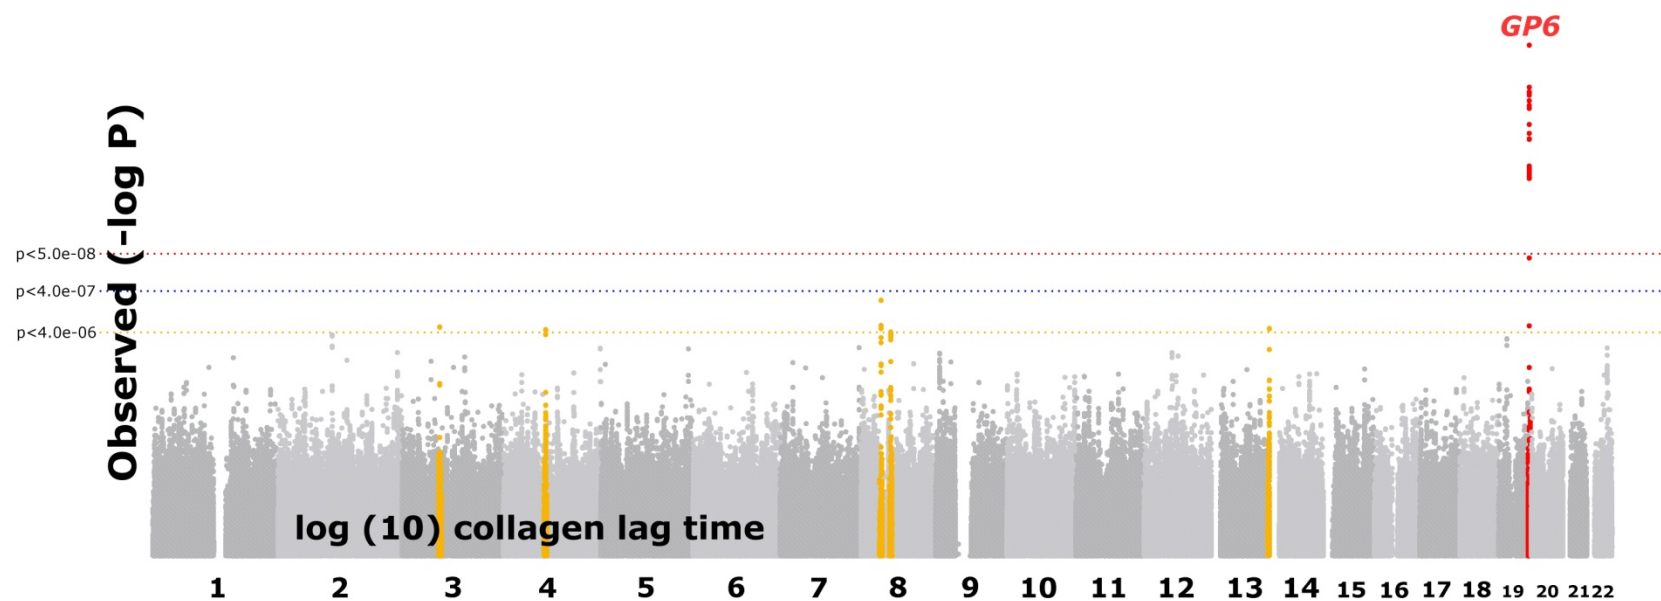

**Supplementary Figure 3.** Collagen lag time distributions. Distributions for GS at left (to 2  $\mu\text{g}/\text{ml}$  equine-tendon derived collagen) and FHS at right (to 190  $\mu\text{g}/\text{ml}$  calf-skin derived collagen).

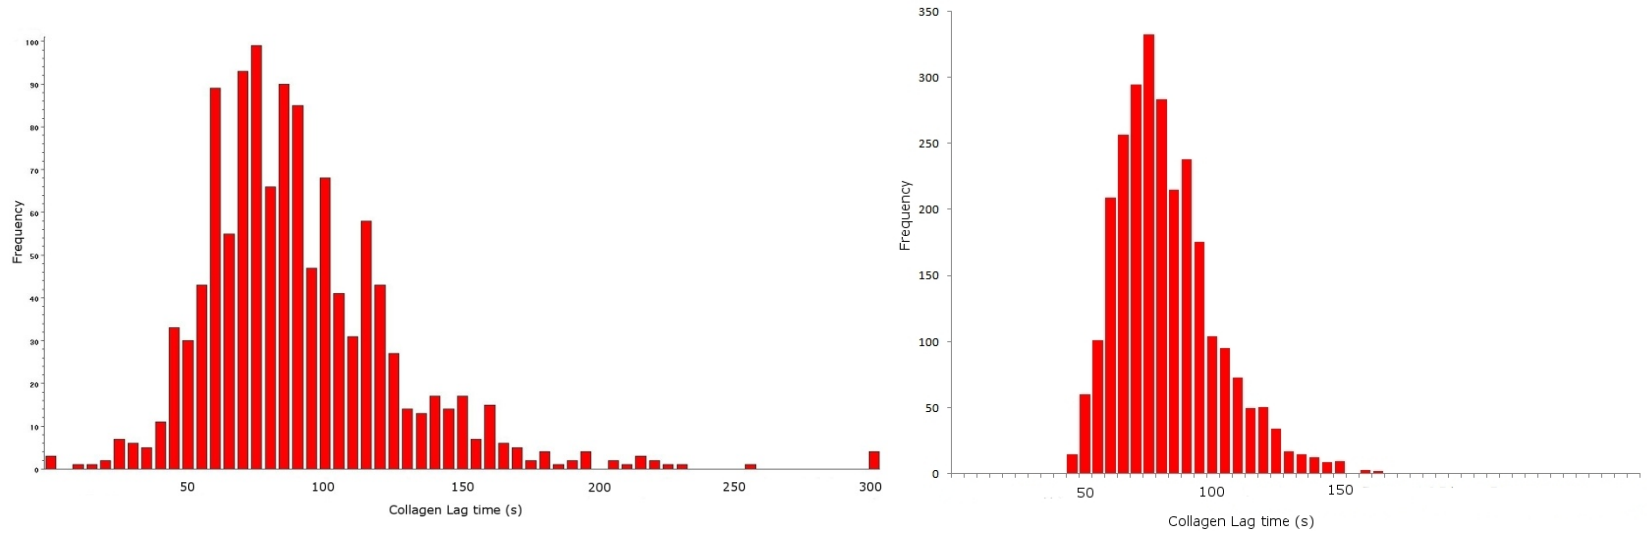

## References

1. Johnson, A.D. *et al.* SNAP: a web-based tool for identification and annotation of proxy SNPs using HapMap. *Bioinformatics* **24**, 2938-2939 (2008).
2. Nanda, N. *et al.* Platelet endothelial aggregation receptor 1 (PEAR1), a novel epidermal growth factor repeat-containing transmembrane receptor, participates in platelet contact-induced activation. *JBC* **280**, 24680-24689 (2005).
3. Jones, C.I. *et al.* on behalf of the Bloodomics consortium. A functional genomics approach reveals novel quantitative trait loci associated with platelet signaling pathways. *Blood* published online May 8, 2009.
4. Antl, M. *et al.* IRAG mediates NO/cGMP-dependent inhibition of platelet aggregation and thrombus formation. *Blood* **109**, 552-559 (2007).
5. Shaughnessy, J.D. *et al.* *Mrvil*, a common MRV integration site in BXH2 myeloid leukemias, encodes a protein with homology to a lymphoid-restricted membrane protein Jaw1. *Oncogene* **18**, 2069-2084.
6. Martinez, M.C. *et al.* Transfer of differentiation signal by membrane microvesicles harboring hedgehog morphogens. *Blood* **108**, 3012-3020 (2006).
7. Freeman, K. *et al.* Genetic polymorphism of the  $\alpha_2$ -adrenergic receptor is associated with increased platelet aggregation, baroreceptor sensitivity, and salt excretion in normotensive humans. *Amer. J. Hyper.* **8**, 863-869 (1995).
8. Kambayashi, J. *et al.* Prevalence of impaired responsiveness to epinephrine in platelets among Japanese. *Thromb. Res.* **81**, 85-90 (1996).
9. Yabe, M. *et al.* Identification of ADRA2A polymorphisms related to shear-mediated platelet function. *Biochem. Biophys. Res. Comm.* **347**, 1001-1005 (2006).
10. Small, K.M., Brown, K.M., Seman, C.A., Theiss, C.T. & Liggett, S.B. Complex haplotypes derived from noncoding polymorphisms of the intronless  $\alpha_{2A}$ -adrenergic gene diversify receptor expression. *PNAS* **103**, 5472-5477 (2006).
11. Schoenwaelder, S.M. *et al.* Identification of a unique co-operative phosphoinositide 3-kinase signaling mechanism regulating integrin  $\alpha_{IIb}\beta_3$  adhesive function in platelets. *J. Biol. Chem.* **282**, 28648-28658 (2007).
12. Hirsch, E. *et al.* PI3K-gamma is a key regulator of inflammatory responses and cardiovascular homeostasis. *Science* **287**, 1049-1053 (2000).
13. Zhao, M. *et al.* Electrical signals control wound healing through phosphatidylinositol-3-OH kinase-gamma and PTEN. *Nature* **442**, 457-480 (2006).
14. Camps, M. *et al.* Blockade of PI3K-gamma suppresses joint inflammation and damage in mouse models of rheumatoid arthritis. *Nat. Med.* **11**, 936-943 (2005).
15. Barber, D.F. *et al.* PI3K-gamma inhibition blocks glomerulonephritis and extends lifespan in a mouse model of systemic lupus. *Nat. Med.* **11**, 933-935 (2005).
16. Soranzo, N. *et al.* A novel variant on chromosome 7q22.3 associated with mean platelet volume, counts, and function. *Blood* **113**, 3831-3837 (2009).
17. Kitajima, K., Kojima, M., Kondo, S. and Takeuchi, T. A role of *jumonji* gene in proliferation but not differentiation of megakaryocyte lineage cells. *Exp. Hem.* **29**, 507-514 (2001).
18. Joutsu-Korhonen, L. *et al.* The low-frequency allele of the platelet collagen signaling receptor glycoprotein VI is associated with reduced functional responses and expression. *Blood.* **101**, 4372-4379 (2003).

19. Trifiro, E. *et al.* The low-frequency isoform of platelet glycoprotein VIb attenuates ligand-mediated signal transduction but not receptor expression or ligand binding. *Blood* **114**, 1893-1899.
20. Massberg, S. *et al.* A crucial role of glycoprotein VI for platelet recruitment to the injured arterial wall in vivo. *J. Exp. Med.* **197**, 41-49 (2003).
21. Letschka, T. *et al.* PKC- $\theta$  selectivity controls the adhesion-stimulating molecule Rap1. *Blood* **112**, 4617-4627 (2008).
22. Severson, E.A., Lee, W.Y., Capaldo, C.T., Nusrat, A. & Parkos, C.A. Junctional adhesion molecule A interacts with Afadin and PDZ-GEF2 to activate Rap1a, regulate  $\beta$ 1 integrin levels, and enhance cell migration. *Mol. Biol. Cell* **20**, 1916-1925 (2009).
23. Meisinger, C. *et al.* A genome-wide association study identifies three loci associated with mean platelet volume. *Am. J. Hum. Genet.* **84**, 66-71 (2009).
24. Yowe, D. *et al.* RGS18 is a myeloerythroid lineage-specific regulator of G-protein-signaling molecule highly expressed in megakaryocytes. *Biochem. J.* **359**, 109-118 (2001).
25. Gagnon, A.W., Murray, D.L. & Leadley, R.J. Cloning and characterization of a novel regulator of G protein signaling in human platelets. *Cell Signal.* **14**, 595-606 (2002).
26. Kim, S.D. *et al.* The expression patterns of RGS transcripts in platelets. *Platelets* **17**, 493-497 (2006).
27. Garcia, A. *et al.* Differential proteome analysis of TRAP-activated platelets: involvement of DOK-2 and phosphorylation of RGS proteins. *Blood* **103**, 2088-2095 (2004).
28. Grewal, P.K. *et al.* The Ashwell receptor mitigates the lethal coagulopathy of sepsis. *Nat. Med.* **14**, 648-655 (2008).
29. Ellies, L.G. *et al.* Sialyltransferase ST3Gal-IV operates as a dominant modifier of hemostasis by concealing asialoglycoprotein receptor ligands. *PNAS* **99**, 10042-10047 (2002).
30. Holada, K., Glierova, H., Simak, J. & Vostal, J.G. Expression of cellular prion protein on platelets from patients with gray platelet or Hermansky-Pudlak syndrome and the protein's association with  $\alpha$ -granules. *Haematologica* **91**, 1126-1129 (2006).
31. Jones, M. *et al.* Human platelets as a substrate source for the in vitro amplification of the abnormal prion protein (PrP<sup>Sc</sup>) associated with variant Creutzfeldt-Jakob disease. *Transfusion* **49**, 376-384 (2009).
32. Guidetti, G.F. *et al.* The G<sub>i</sub>-coupled P2Y<sub>12</sub> receptor regulates diacylglycerol-mediated signaling in human platelets. *J. Biol. Chem.* **283**, 28795-28805 (2008).
33. Cannobbio, I. *et al.* Genetic evidence for a predominant role of PI3K $\beta$  catalytic activity in ITAM- and integrin-mediated signaling in platelets. *Blood*, published online June 10, 2009.
34. Wang, Z. *et al.* Rap1b is critical for glycoprotein VI-mediated but not ADP receptor-mediated  $\alpha$ <sub>2</sub> $\beta$ <sub>1</sub> activation. *J. Thromb. Haem.* **7**, 693-700 (2009).
35. Chrzanowska-Wodnicka, M., *et al.* Rap1b is required for normal platelet function and hemostasis in mice. *J. Clin. Invest.* **115**, 680-687 (2005).
36. Watkins, N.A. *et al.* A HaemAtlas: characterizing gene expression in differentiated human blood cells. *Blood* **113**, 1-9 (2009).
